# Supplementary material for: A single vertebrate DNA virus protein disarms invertebrate immunity to RNA virus infection
Source: eLife. 2014 Jun 25;3:e02910. doi: 10.7554/eLife.02910 (PMC4112549; doi:10.7554/eLife.02910)
Supplement: Supplementary file 2. — Primers used for dsRNA-mediated RNAi of VACV transcripts. DOI: http://dx.doi.org/10.7554/eLife.02910.026 [file elife02910s002.xls]

## Sheet: Sheet1
Supplementary File 2- Primers used for dsRNA-mediated RNAi of VACV transcripts.
VACV RNAi Target	Forward Primer Sequence (5'-to-3')	Reverse Primer Sequence (5'-to-3')
A55R	TAATACGACTCACTATAGGGATGAATAACAGCAGTGAATT	TAATACGACTCACTATAGGGATTGATTCCTCTGTTAAGTA
A53R	TAATACGACTCACTATAGGGATGATAATATTAAAAGATGG	TAATACGACTCACTATAGGGTTACCTTATCAAATGATCCG
A52R	TAATACGACTCACTATAGGGATGGACATAAAGATAGATAT	TAATACGACTCACTATAGGGAACAGTTTAATAGCTCGTAA
A51R	TAATACGACTCACTATAGGGATGGATGGTGTTATTGTATA	TAATACGACTCACTATAGGGATAGAGAAATCAAACAGGAG
A40R	TAATACGACTCACTATAGGGATGAACAAACATAAGACAGA	TAATACGACTCACTATAGGGTTATATAGTGTAACACGAAT
A4L	TAATACGACTCACTATAGGGATGGACTTCTTTAACAAGTT	TAATACGACTCACTATAGGGGGTAACGTCTGAGAAGGTTG
B13R	TAATACGACTCACTATAGGGATGGATATCTTCAGGGAAAT	TAATACGACTCACTATAGGGATCATACTTACATCTACCAT
B8R	TAATACGACTCACTATAGGGATGAGATATATTATAATTCT	TAATACGACTCACTATAGGGTAGTCATCGATATCATATGG
B4R	TAATACGACTCACTATAGGGTCATTATATAGCACGCGTGT	TAATACGACTCACTATAGGGTCTGATTCTGATTTCTTATA
L2R	TAATACGACTCACTATAGGGATGGAAGTTATCACTGATCG	TAATACGACTCACTATAGGGTTATAGTATAAAGTAATAAAAAAT
O1L	TAATACGACTCACTATAGGGATGTTCATGTATCCGGAATT	TAATACGACTCACTATAGGGTATAGATGTAGTGTAGCTCC
F11L	TAATACGACTCACTATAGGGATGGGGTTTTGCATTCCATC	TAATACGACTCACTATAGGGCGAATTACAGAAGTACCTGG
F5L	TAATACGACTCACTATAGGGATGGGTACGAACGGCGTTAG	TAATACGACTCACTATAGGGGTAGGAAATGGAAGATATTT
F3L	TAATACGACTCACTATAGGGATGCCGATATTTGTTAATAC	TAATACGACTCACTATAGGGGATAGATAATCAAAATTGTC
F1L	TAATACGACTCACTATAGGGATGTTGTCGATGTTTATGTG	TAATACGACTCACTATAGGGCTGGGTTCATACATCGTCTA
K3L	TAATACGACTCACTATAGGGATGCTTGCATTTTGTTATTC	TAATACGACTCACTATAGGGTTATTGATGTCTACACATCC
K2L	TAATACGACTCACTATAGGGATGATTGCGTTATTGATACT	TAATACGACTCACTATAGGGTGATTGCCCATAGAGTATTA
K1L	TAATACGACTCACTATAGGGATGGATCTGTCACGAATTAA	TAATACGACTCACTATAGGGTACAACTAAGGAGAATAGCCA
N1L	TAATACGACTCACTATAGGGATGAGGACTCTACTTATTAG	TAATACGACTCACTATAGGGTTATTTTTCACCATATAGATC
M2L	TAATACGACTCACTATAGGGATCGCATCTCTCGGGTATTC	TAATACGACTCACTATAGGGTTTATCCTTGGGGTGTAGGT
M1L	TAATACGACTCACTATAGGGATGATATTTGTTATAGAGAG	TAATACGACTCACTATAGGGCAACCGAGTTGTTAATCTTG
C1L	TAATACGACTCACTATAGGGATGGTGAAAAATAATAAAAT	TAATACGACTCACTATAGGGAAGTATTCAGTAGCCAATCC
C2L	TAATACGACTCACTATAGGGATGGAAAGCGTGATATTTTC	TAATACGACTCACTATAGGGAATATCATAGCTGTAACATC
C3L	TAATACGACTCACTATAGGGATGAAGGTGGAGAGCGTGAC	TAATACGACTCACTATAGGGGTATAAAAATCCTCGTATCC
C4L	TAATACGACTCACTATAGGGATGGATACTATTAAAATATT	TAATACGACTCACTATAGGGCTGTCGCTAATATCTAAATA
C5L	TAATACGACTCACTATAGGGATGGCGTATATGAACAGATC	TAATACGACTCACTATAGGGATATGTTATAAATTTAAATC
C9L	TAATACGACTCACTATAGGGATGGTTAACGATAAGATACTC	TAATACGACTCACTATAGGGCCCTATAGTGAGTCGTATTA
C12L	TAATACGACTCACTATAGGGATGGATATCTTTAAAGAACT	TAATACGACTCACTATAGGGTTAGAAATATAAAACTTGTC
C23L	TAATACGACTCACTATAGGGATGCATGTGCCTGCCAGTCT	TAATACGACTCACTATAGGGAGTACTGGATGGGTCTTGAT
